# Supplementary material
Source: Royal Society of Chemistry journal article supplement (doi:10.1039/d6tc00868b)

## Supplementary Information

# From Binary to Ternary: NiFeM Alloys in Unified Electrodes for High Performance Anion-Exchange Membrane Water Electrolysis

Dae Hyun Lee<sup>a,b,†</sup>, SungBin Park<sup>c,†</sup>, Sungeun Heo<sup>a,b</sup>, Min Seok Gi<sup>d</sup>, Hyunjoon Lee<sup>e</sup>, Eunwoo Seo<sup>f</sup>, Junho Min<sup>f</sup>, Heejin Lee<sup>f</sup>, Jihun Cho<sup>f</sup>, Ji Eun Park<sup>d,\*</sup>, Yung-Eun Sung<sup>a,b</sup>

<sup>a</sup>School of Chemical and Biological Engineering, Seoul National University, Seoul 08826, Republic of Korea

<sup>b</sup>Center for Nanoparticle Research, Institute for Basic Science (IBS), Seoul 08826, Republic of Korea

<sup>c</sup>Center for Hydrogen and Fuel Cells, Korea Institute of Science and Technology (KIST), Seoul 02792, Republic of Korea

<sup>d</sup>Graduate School of Convergence Technology and Energy, Tech University of Korea, Siheung-si, 15073, Republic of Korea

<sup>e</sup>Hydrogen Research Department, Korea Institute of Energy Research (KIER), Daejeon 34129, Republic of Korea

<sup>f</sup>Department of Chemical Engineering and Biotechnology, Tech University of Korea, Siheung-si, 15703, Republic of Korea

\* Corresponding authors: [jepark91@tukorea.ac.kr](mailto:jepark91@tukorea.ac.kr) (J. E. Park)

**Table S1.** The Loading Table.

| Sample name | Loading (mg/cm <sup>2</sup> ) |
|-------------|-------------------------------|
| UE-NiFeCo-1 | 0.651                         |
| UE-NiFeCo-2 | 0.708                         |
| UE-NiFeCo-3 | 0.846                         |
| UE-NiFeCo-4 | 0.971                         |
| UE-NiFeCo-5 | 1.063                         |
| UE-NiFeCu-1 | 0.869                         |
| UE-NiFeCu-2 | 0.937                         |
| UE-NiFeCu-3 | 1.028                         |
| UE-NiFeCu-4 | 0.948                         |
| UE-NiFeCu-5 | 0.937                         |
| UE-NiFeLa-1 | 1.063                         |
| UE-NiFeLa-2 | 1.166                         |
| UE-NiFeLa-3 | 1.406                         |
| UE-NiFeLa-4 | 1.68                          |
| UE-NiFeLa-5 | 1.92                          |
| UE-NiFe     | 0.651                         |

**Table S2.** The comparison in atomic ratios (Ni: Fe: Co) of UE-NiFeCo-1, 2, 3, 4, and 5.

| Sample name | Ni | Fe   | Co   |
|-------------|----|------|------|
| UE-NiFeCo-1 | 1  | 0.78 | 0.60 |
| UE-NiFeCo-2 | 1  | 0.78 | 0.87 |
| UE-NiFeCo-3 | 1  | 0.82 | 1.23 |
| UE-NiFeCo-4 | 1  | 0.68 | 1.74 |
| UE-NiFeCo-5 | 1  | 0.63 | 2.00 |

**Table S3.** The comparison in atomic ratios (Ni: Fe: Cu) of UE-NiFeCu-1, 2, 3, 4, and 5.

| Sample name | Ni | Fe   | Cu   |
|-------------|----|------|------|
| UE-NiFeCu-1 | 1  | 0.84 | 0.64 |
| UE-NiFeCu-2 | 1  | 0.91 | 0.96 |
| UE-NiFeCu-3 | 1  | 0.97 | 1.28 |
| UE-NiFeCu-4 | 1  | 0.96 | 1.67 |
| UE-NiFeCu-5 | 1  | 0.87 | 2.03 |

**Table S4.** The comparison in atomic ratios (Ni: Fe: La) of UE-NiFeLa-1, 2, 3, 4, and 5.

| Sample name | Ni | Fe   | La   |
|-------------|----|------|------|
| UE-NiFeLa-1 | 1  | 0.93 | 0.64 |
| UE-NiFeLa-2 | 1  | 0.91 | 1.00 |
| UE-NiFeLa-3 | 1  | 0.90 | 1.39 |
| UE-NiFeLa-4 | 1  | 0.95 | 1.76 |
| UE-NiFeLa-5 | 1  | 0.99 | 2.18 |

**Table S5.** The EIS fitting results.

| Sample name  | Rohm ( $\Omega \text{ cm}^2$ ) | CPE-T   | R ( $\Omega \text{ cm}^2$ ) |
|--------------|--------------------------------|---------|-----------------------------|
| AEMWE-NiFeCo | 0.043204                       | 0.3104  | 0.018598                    |
| AEMWE-NiFeCu | 0.05847                        | 0.64871 | 0.0992                      |
| AEMWE-NiFeLa | 0.050265                       | 0.17644 | 0.045912                    |
| AEMWE-NiFe   | 0.048692                       | 0.21178 | 0.022761                    |
| NiFe-NP      | 0.09771                        | 0.11919 | 0.0938                      |

**Figure S1.** SEM–EDS elemental mapping images of the UE-NiFeCo sample. (a) Combined EDS mapping showing the overall distribution of O, Ni, Fe and Co. (b-e) Individual EDS elemental mappings of (b) O, (c) Ni, (d) Fe, and (e) Co.

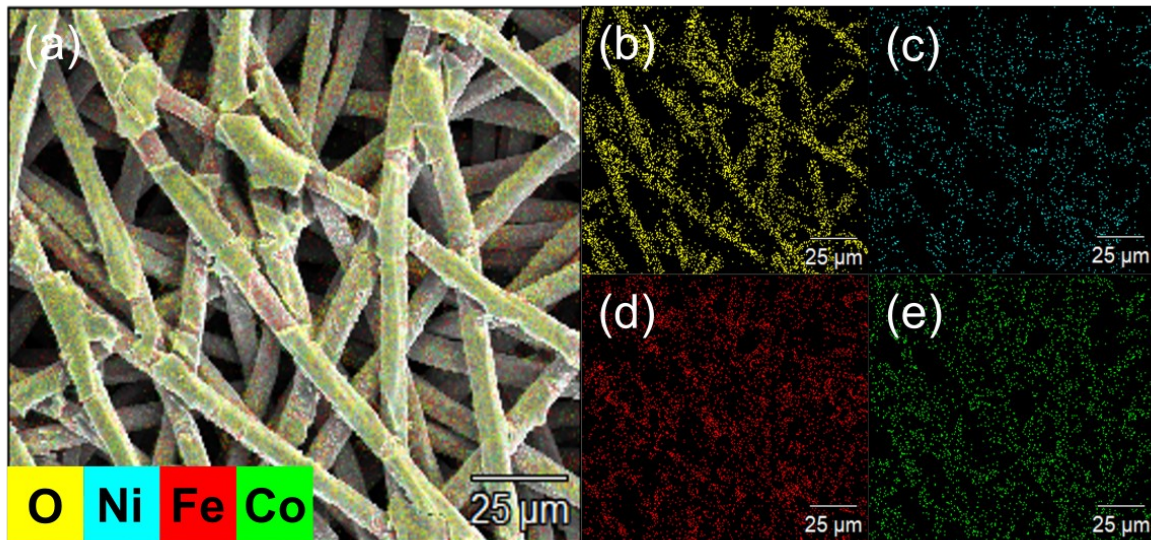

**Figure S2.** SEM–EDS elemental mapping images of the UE-NiFeCu sample. (a) Combined EDS mapping showing the overall distribution of O, Ni, Fe and Cu. (b-e) Individual EDS elemental mappings of (b) O, (c) Ni, (d) Fe, and (e) Cu.

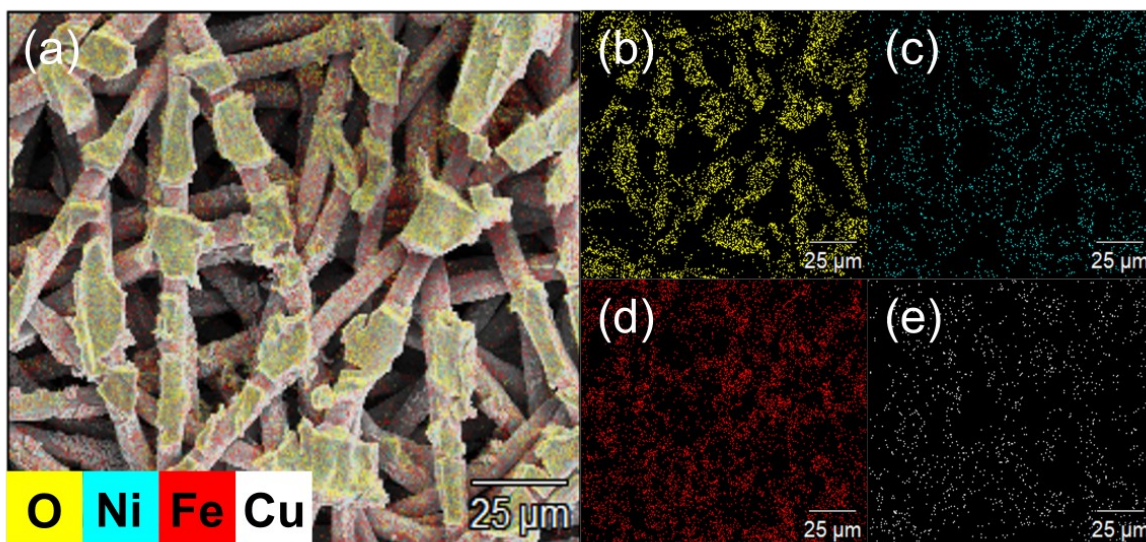

**Figure S3.** SEM–EDS elemental mapping images of the UE-NiFeLa sample. (a) Combined EDS mapping showing the overall distribution of O, Ni, Fe and La. (b–e) Individual EDS elemental mappings of (b) O, (c) Ni, (d) Fe, and (e) La.

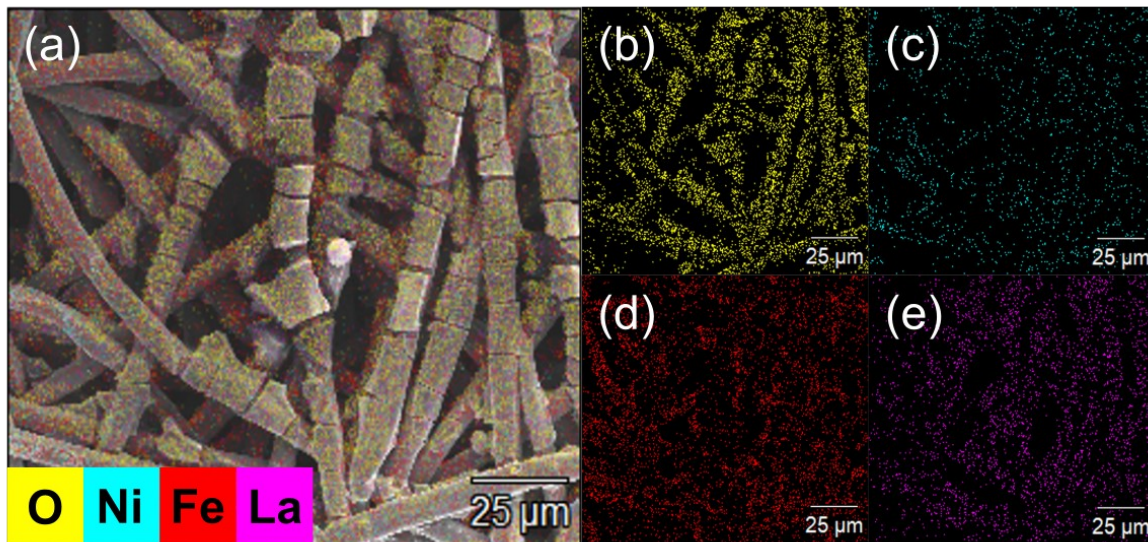

**Figure S4.** HR-TEM images of (a) UE-NiFeCo, (b) UE-NiFeCu, and (c) UE-NiFeLa.

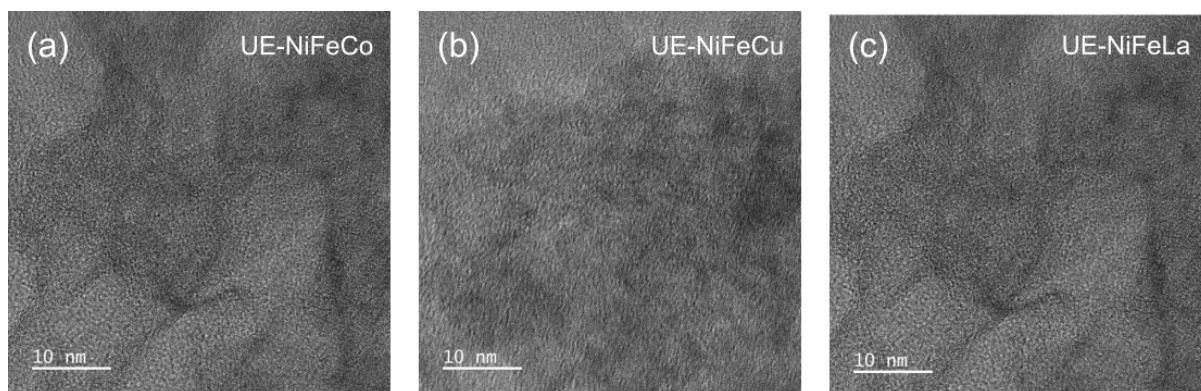

**Figure S5.** TEM-EDS elemental mapping images of the electrodeposited samples. (a) Combined elemental mapping of the UE-NiFeCo sample. (b-d) Individual elemental mappings of (b) Ni, (c) Fe, and (d) Co. (e) Combined elemental mapping of the UE-NiFeCu sample. (f-h) Individual elemental mappings of (f) Ni, (g) Fe, and (h) Cu. (i) Combined elemental mapping of the UE-NiFeLa sample. (j-l) Individual elemental mappings of (j) Ni, (k) Fe, and (l) La.

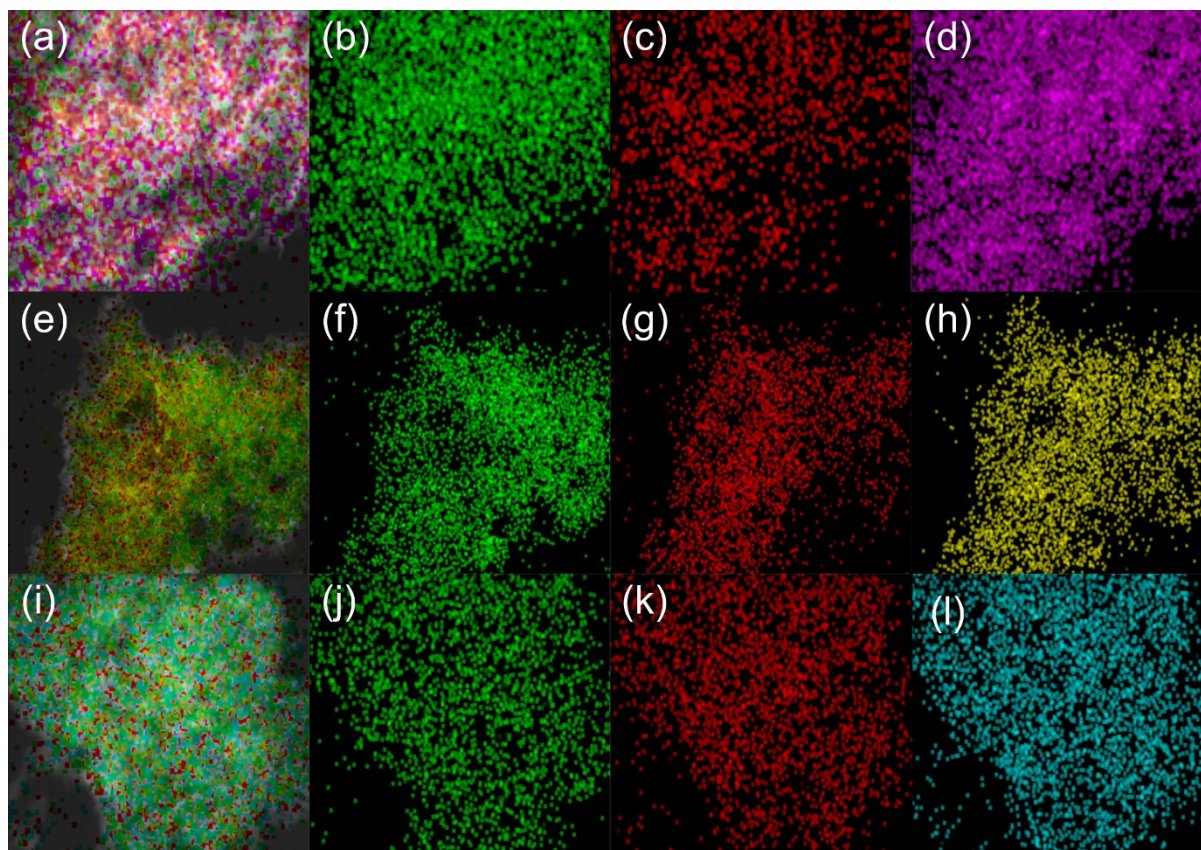

**Figure S6.** XRD spectra of the three electrodes (UE-NiFeCo, UE-NiFeCu, and UE-NiFeLa)

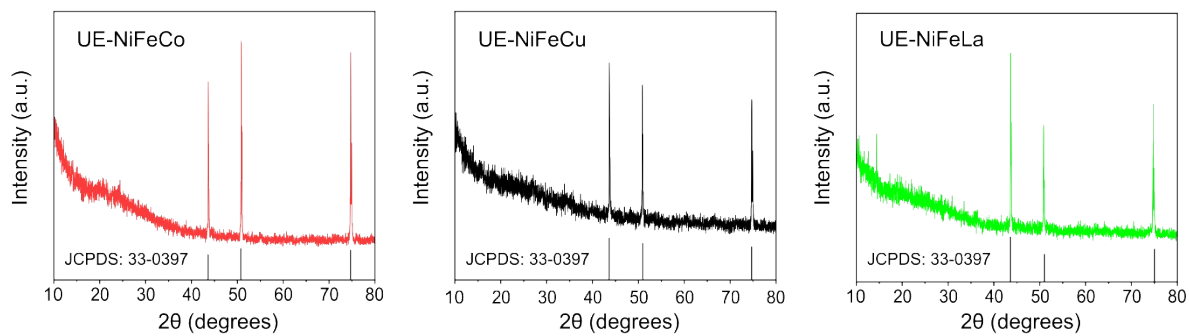

**Figure S7.** XPS O 1s spectra of (a) NiFeCo (b) NiFeCu (c) NiFeLa.

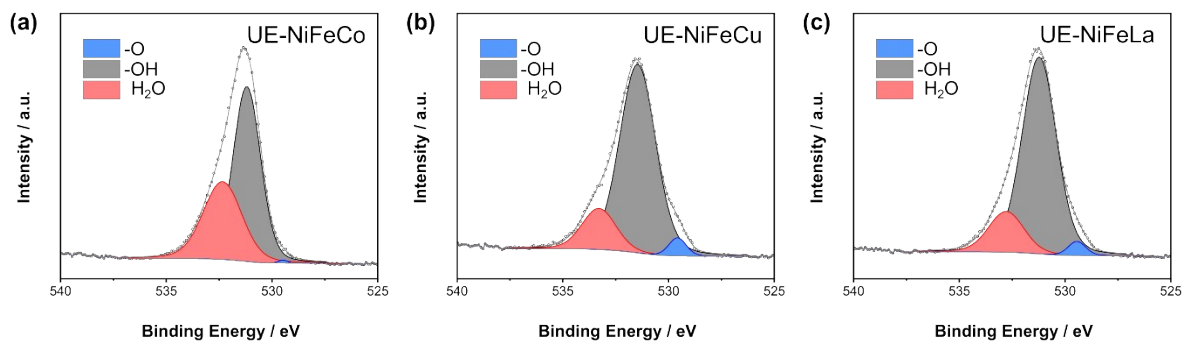

**Figure S8.** FE-SEM of UE-NiFe

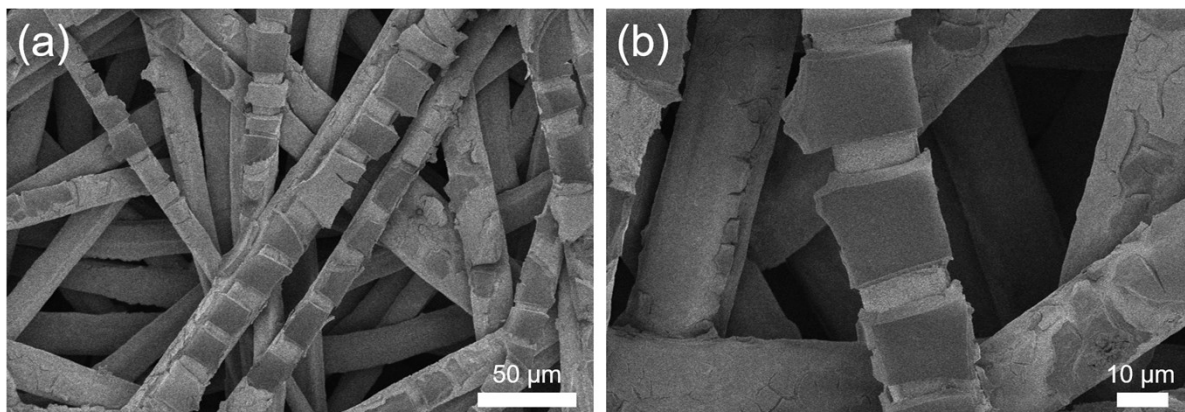

**Figure S9.** FE-SEM images of NiFe-NP

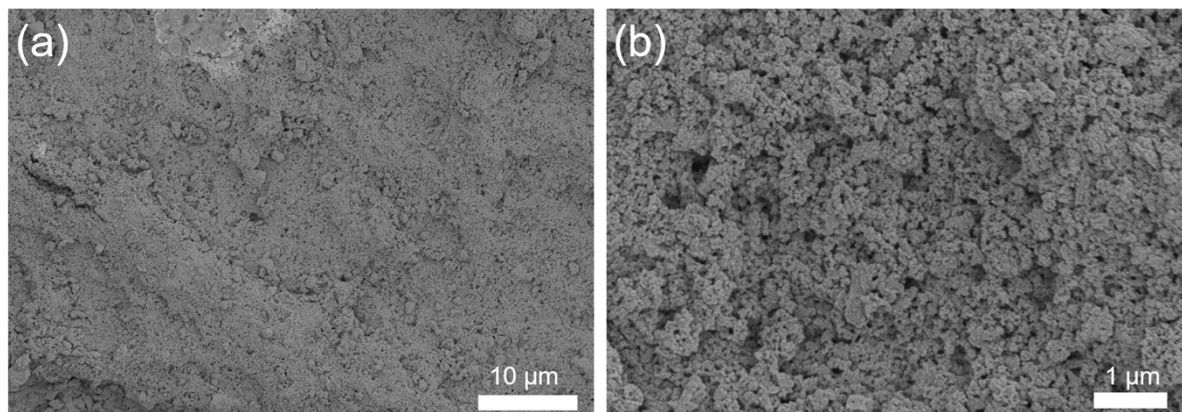

**Figure S10.** (a) The linear relation between the double-layer charging current and the scan rate. Cyclic voltammetry (CV) curves of (b) UE-NiFeCo, (c) UE-NiFeCu, (d) UE-NiFeLa, (e) UE-NiFe, and (f) NiFe-NP recorded at various scan rates ranging from 10  $\text{mV s}^{-1}$  to 50  $\text{mV s}^{-1}$ .

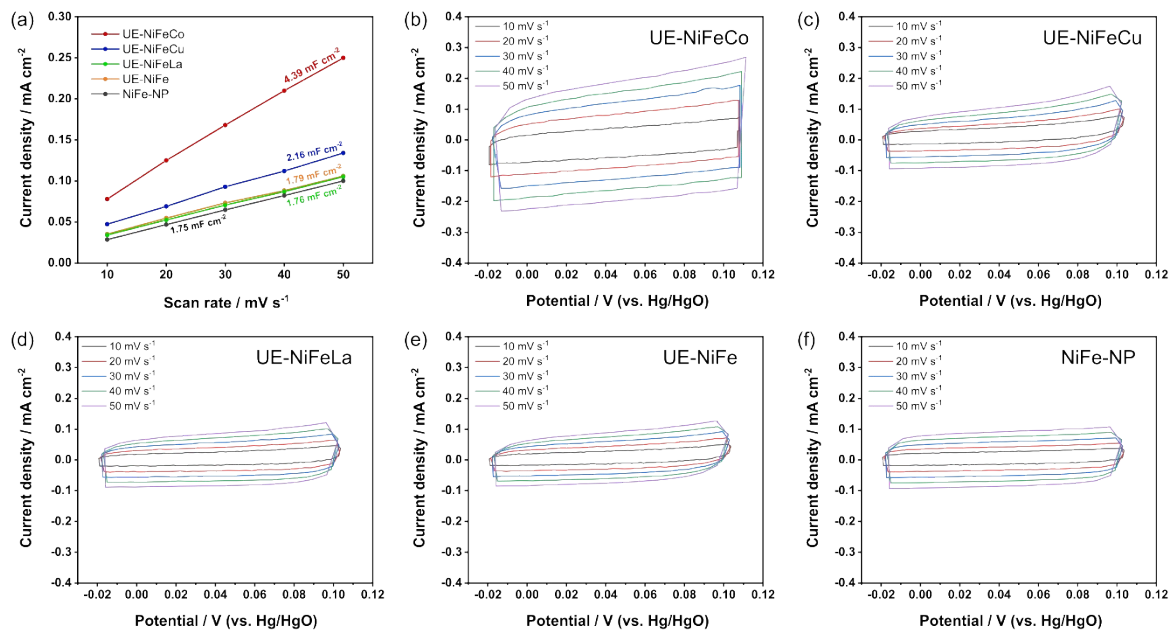

**Figure S11** Stability test of UE-NiFeCo at a constant current density of  $100 \text{ mA cm}^{-2}$  for 1,000

h

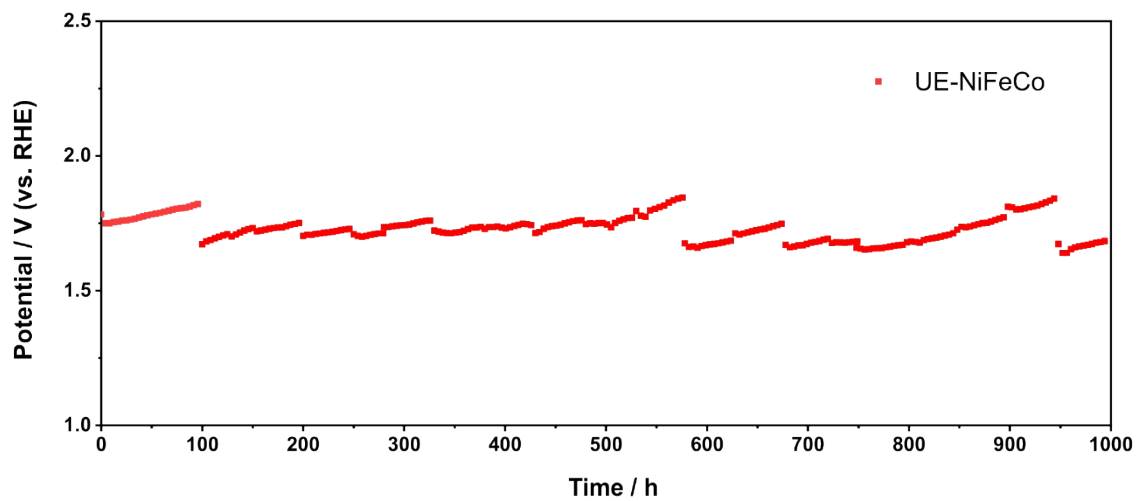

**Figure S12.** FE-SEM images of UE-NiFeCo after stability test conducted at a constant current density of  $100 \text{ mA cm}^{-2}$  for 1,000 h

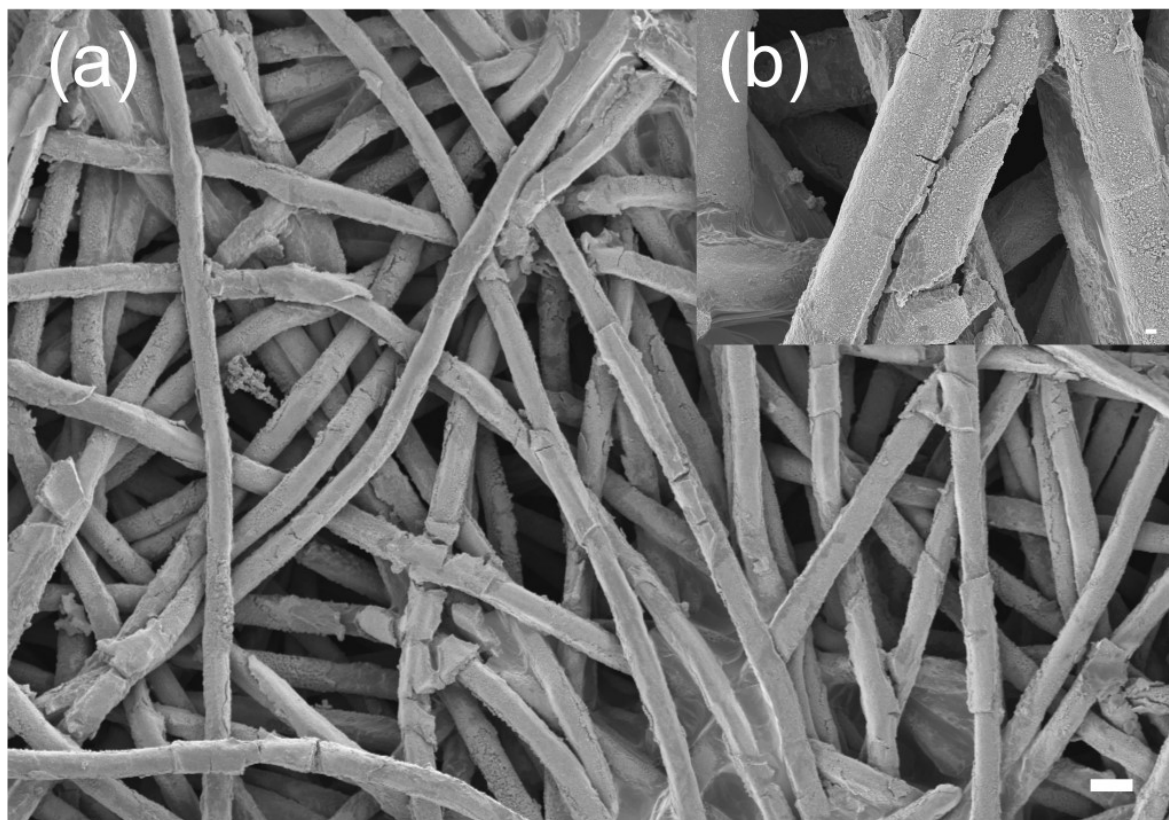

Supplement: d6tc00868b1.pdf [file d6tc00868b1.pdf]
